# Supplementary material for: Estimation of a Structural Equation Modeling of Quality of Life Mediated by Difficulty in Daily Life in Survivors of Breast Cancer
Source: MDPI journal article supplement (doi:10.3390/healthcare11142082), 2023-07-21
Supplement: s1 [file s1]

**Supplement Table S1** Results of sensitivity analyses

| analysis |                        | direct effect | indirect effect |
|----------|------------------------|---------------|-----------------|
| model 1  | (principal analysis)   | 0.274         | 0.163           |
| model 2  | (sensitivity analysis) | 0.309         | 0.158           |
| model 3  | (sensitivity analysis) | 0.307         | 0.182           |
