# Supplementary figures and images for: Estimation of a Structural Equation Modeling of Quality of Life Mediated by Difficulty in Daily Life in Survivors of Breast Cancer
Source: MDPI journal article supplement (doi:10.3390/healthcare11142082), 2023-07-21

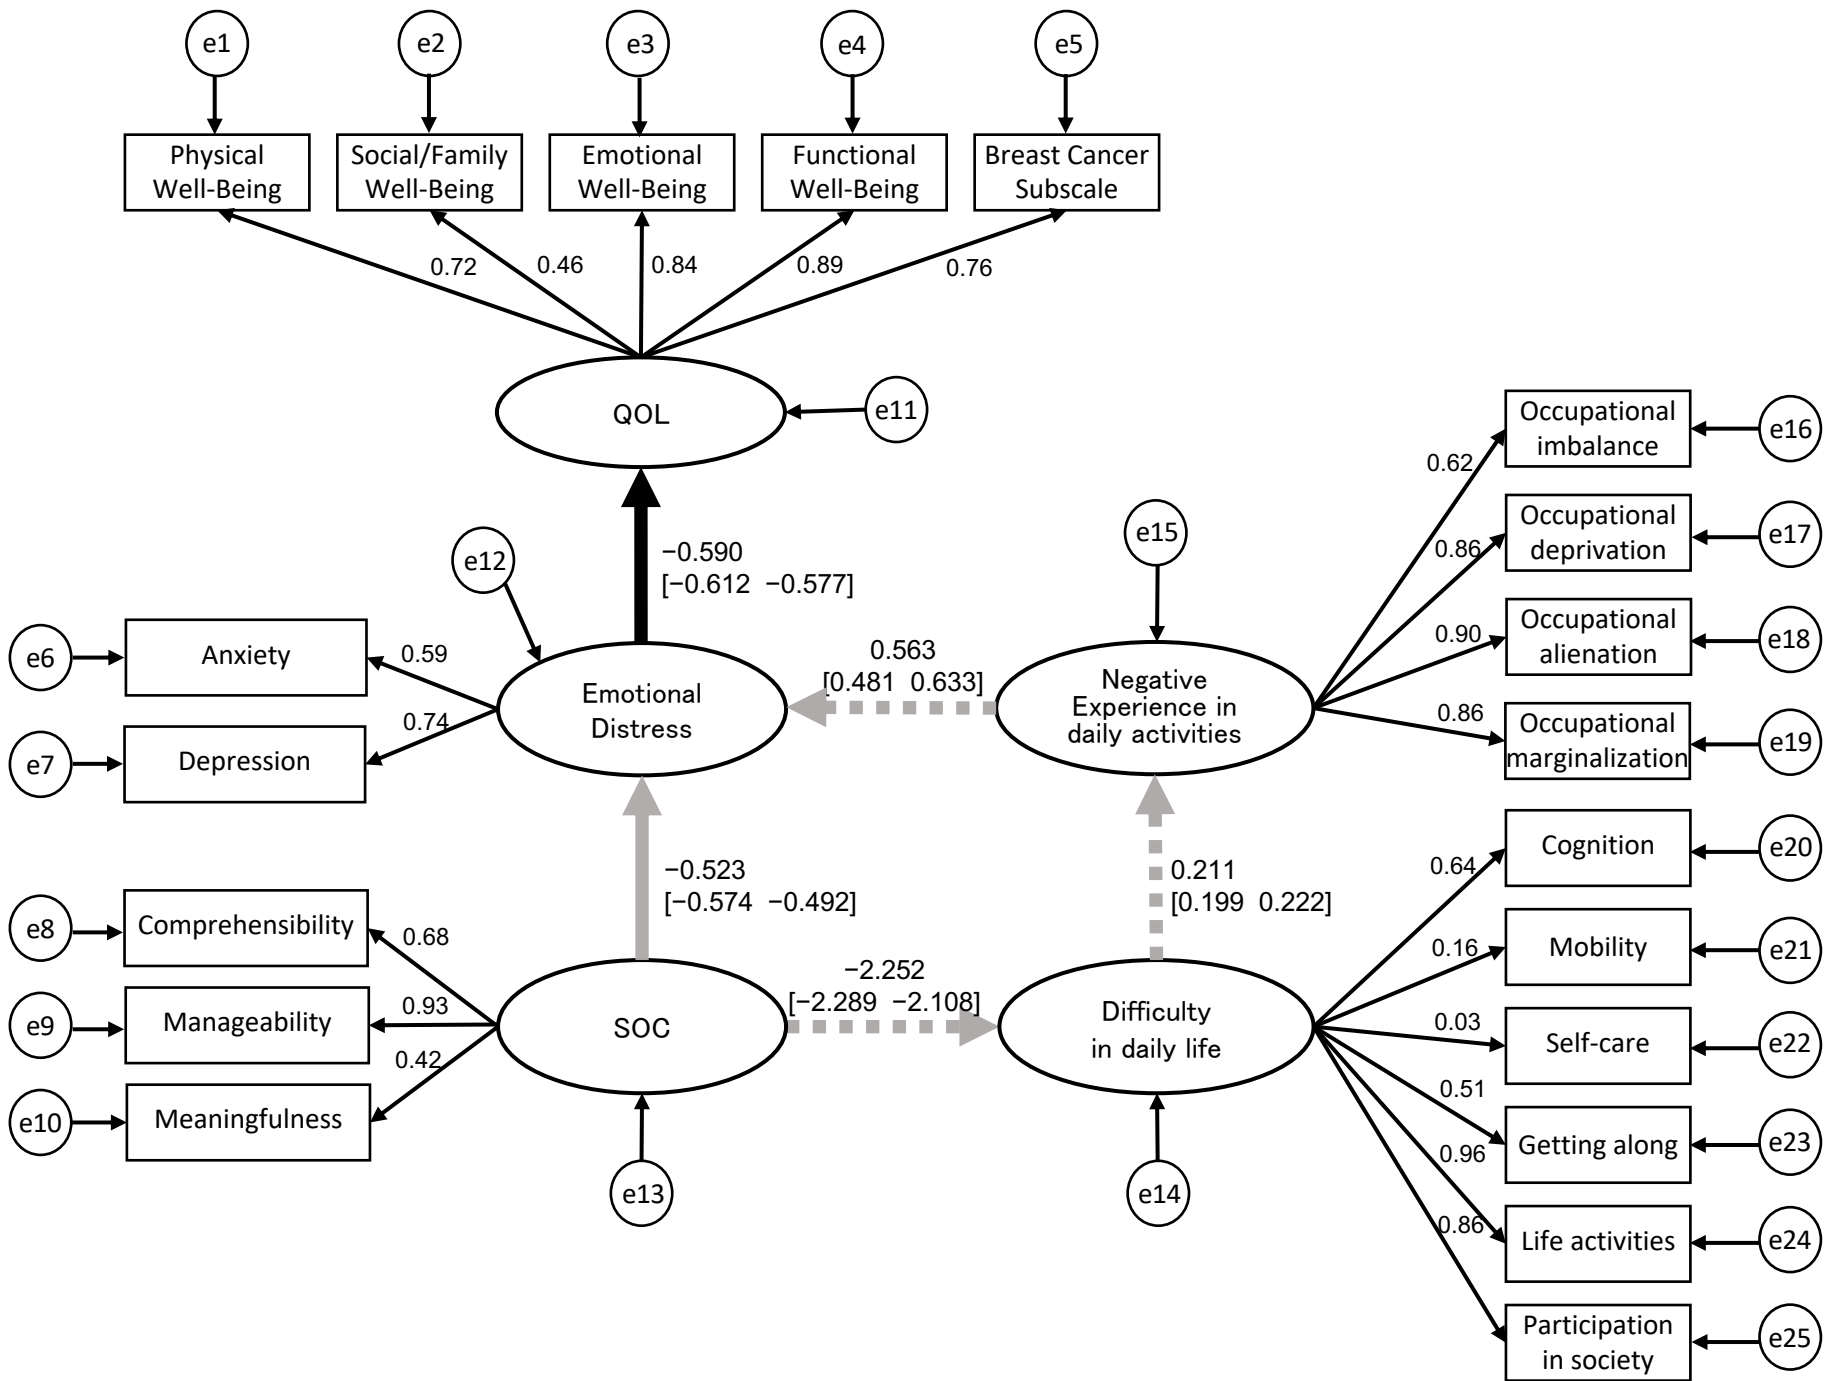

Supplement: s1 [file s1]

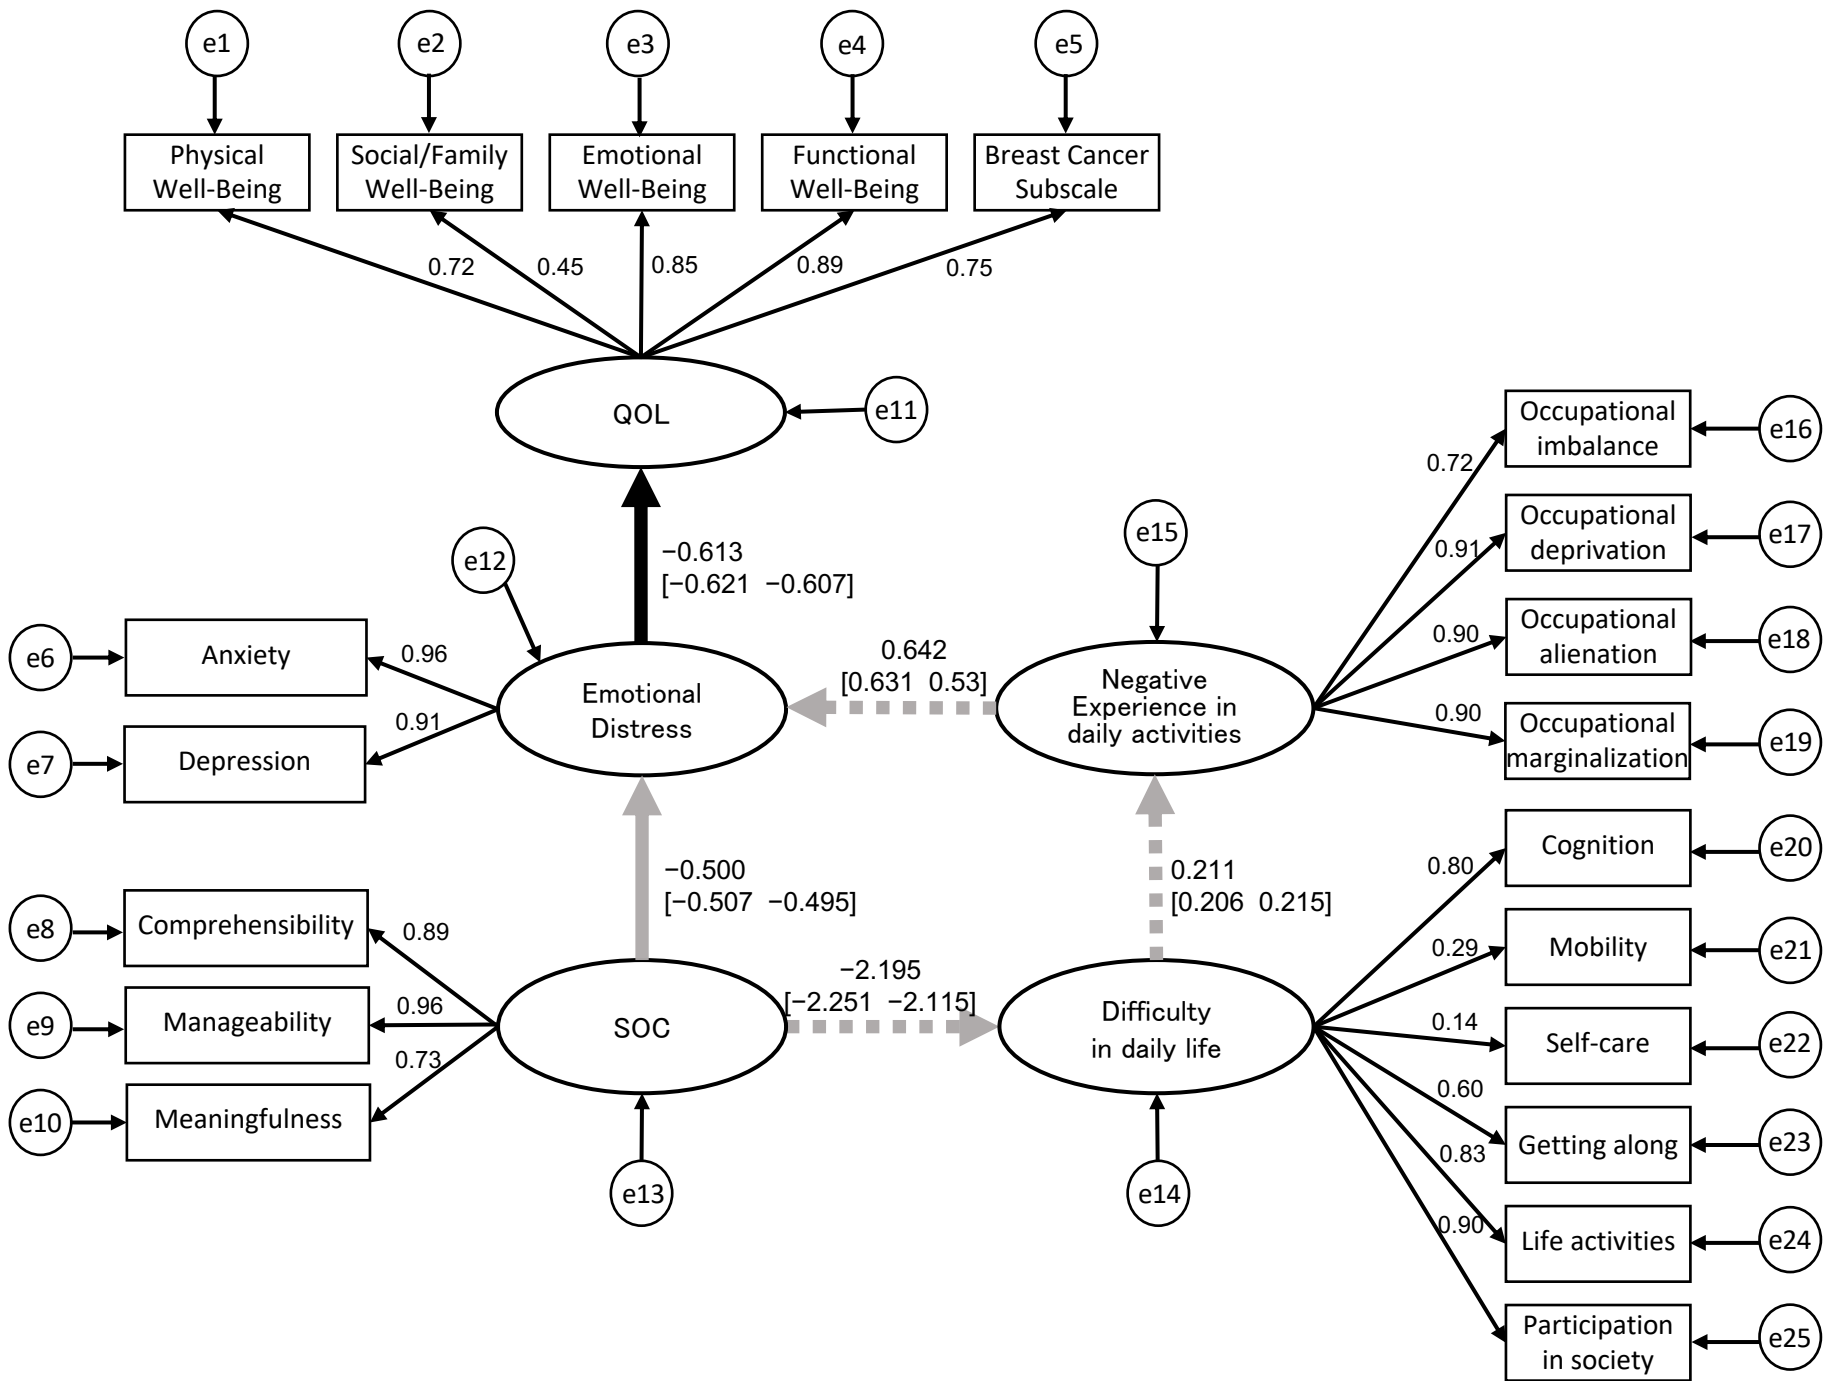

Supplement: s1 [file s1]
